# Supplementary material for: Tracing the evolutionary and genetic footprints of atmospheric tillandsioids transition from land to air
Source: PubMed Central journal article supplement — Nat Commun. 2024 Nov 6;15:9599. doi: 10.1038/s41467-024-53756-7 (PMC11541568; doi:10.1038/s41467-024-53756-7), 2024-11-06
Supplement: 41467_2024_53756_MOESM3_ESM.pdf [file 41467_2024_53756_MOESM3_ESM.pdf]

### **Description of Additional Supplementary Files**

File Name: Supplementary Data 1

Description: Go terms enrichment of LTR-RT affected genes in *T. duratii*.

File Name: Supplementary Data 2

Description: Go terms enrichment of LTR-RT affected genes in *V. erythroductylon*.

File Name: Supplementary Data 3

Description: Top-20 maker genes of eleven root cell clusters in *V. erythroductylon*.

File Name: Supplementary Data 4

Description: Top-50 maker genes of ten leaf cell clusters in *T. duratii*.

File Name: Supplementary Data 5

Description: The cultivated locations of allspecies.
